# Supplementary material for: Secretion of mitochondrial DNA via exosomes promotes inflammation in Behçet's syndrome
Source: PubMed Central journal article supplement — EMBO J. 2023 Sep 4;42(20):e112573. doi: 10.15252/embj.2022112573 (PMC10577637; doi:10.15252/embj.2022112573), 2023-09-04
Supplement: EMBJ-42-e112573-s009.pdf [file EMBJ-42-e112573-s009.pdf]

## **Appendix Figure and Tables**

### **Pyroptotic secretion of mitochondrial DNA via exosomes promotes inflammation in Behçet's syndrome**

Appendix Figure S1: **Lack of contamination by other TLR ligands.**

Appendix Table S1: **The summarized characterization of the enrolled patients**

Appendix Table S2: **Details of the reagents, antibodies, cell lines, and primers.**

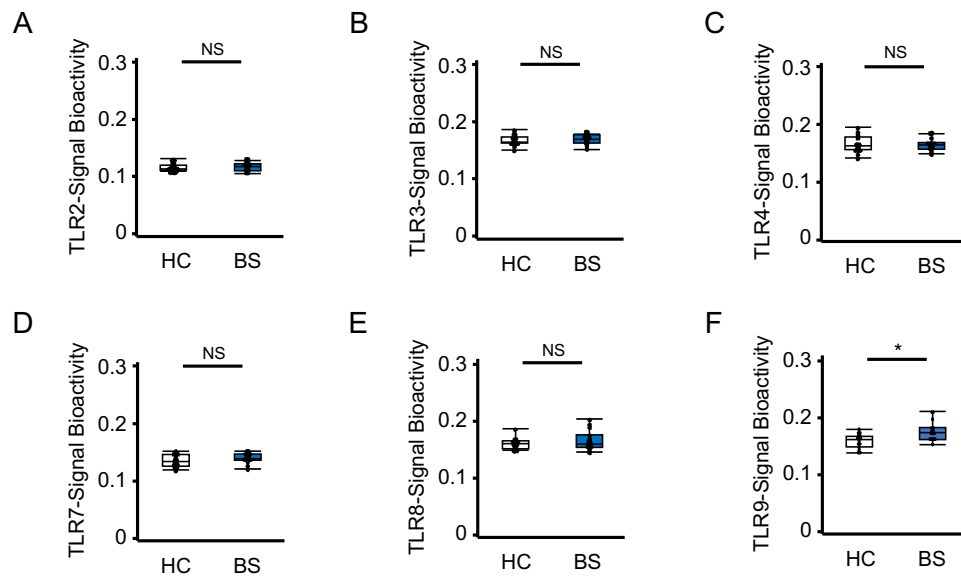

**Appendix Figure S1: Lack of contamination by other TLR ligands.**

**A–F)** Response of TLR-reporter cells to HC and BS serum. HC and BS serum was added to the HEK-Blue-TLR2 (**A**), -TLR3 (**B**), -TLR4 (**C**), -TLR7 (**D**), -TLR8 (**E**), and -TLR9 (**F**) reporter cells, and SEAP levels in the CS were determined with QUANTI-Blue (OD<sub>620</sub>). Statistical analyses were performed using a Mann–Whitney U test (**A–F**) (mean  $\pm$  SD; \* $p < 0.05$ ; NS, not statistically significant). The data are representative of three independent experiments.

A

| Characteristics and clinical manifestations | BS (n=59)            | HC (n=15)  |
|---------------------------------------------|----------------------|------------|
| Age (years)                                 | 44 (37-55)           | 23 (22-24) |
| Sex (female)                                | 25 (42.3)            | 2 (13.3)   |
| Oral ulcers                                 | 21 (35.6)            |            |
| Uveitis                                     | 7 (11.9)             |            |
| Skin lesions                                | 10 (16.9)            |            |
| Genital ulcers                              | 8 (13.6)             |            |
| Arthralgias                                 | 7 (11.9)             |            |
| Intestinal lesions                          | 7 (11.9)             |            |
| Vascular involvements                       | 1 (1.7)              |            |
| Nervous system involvements                 | 2 (3.4)              |            |
| WBC ( $\times 10^9/L$ )                     | 7.510 (6.010-10.390) |            |
| CRP (mg/dL)                                 | 0.1 (0.04-0.76)      |            |
| Corticosteroid                              | 20 (36.3)            |            |
| Colchicine                                  | 27 (49.1)            |            |
| Infliximab                                  | 19 (34.5)            |            |

B

| Characteristics | RA (n=12)      | SLE (n=22)     | SjS (n=10)   | AAV (n=14) | PM/DM (n=10)   | SSc (n=9)    |
|-----------------|----------------|----------------|--------------|------------|----------------|--------------|
| Age (years)     | 61.5 (51.5-70) | 44.5 (38.5-60) | 56 (48.5-67) | 71 (68-77) | 51 (41.3-60.5) | 61 (59.4-64) |
| Sex (female)    | 11 (91.6)      | 15 (68.2)      | 9 (90)       | 5 (35.7)   | 8 (80)         | 6 (66.7)     |

**Appendix Table S1. The summarized characterization of the enrolled patients**

Enrolled patient's profiles of BS and HC (A), and other rheumatic diseases (B). Data are presented as n (%) or median (IQR). CRP, C-reactive protein; WBC, white blood cell; HC, healthy control; BS, Behçet's syndrome; RA, Rheumatoid Arthritis; SLE, Systemic Lupus erythematosus; SjS, Sjogren Syndrome; AAV, ANCA associated Vasculitis; PM/DM, Polymyositis/Dermatomyositis; SSc, Systemic sclerosis.

## Reagents and Kits

| Name                                                                   | Vender                       | Catalog number       |
|------------------------------------------------------------------------|------------------------------|----------------------|
| Adenosine5-triphosphate (ATP) disodium salt hydrate                    | Sigma                        | A1852                |
| Nigericin sodium salt Ready Made Solution (NIG)                        | Sigma                        | SML1779              |
| Lipopolysaccharides from Escherichia coli O111:B4 (LPS)                | Sigma                        | L3024                |
| Phorbol 12-myristate 13-acetate (PMA)                                  | Sigma                        | P1585-1MG            |
| N-Formyl-Met-Leu-Phe                                                   | Sigma                        | F3506-5MG            |
| DNase1 Amplification Grade                                             | Sigma                        | AMPD1-1KT            |
| IL-1R antagonist                                                       | Sigma                        | 407616-25MGCN        |
| ODN2006                                                                | InvivoGen                    | tlr-2006             |
| 2,3-cGAMP                                                              | InvivoGen                    | tlrl-cga23           |
| Ac-YVAD-cmk                                                            | InvivoGen                    | 178603-78-6          |
| Monosodium urate crystals                                              | InvivoGen                    | tlrl-msu-25          |
| Recombinant human IL-12/p70                                            | PeptoTech                    | 200-12               |
| Recombinant human IL-17                                                | PeptoTech                    | 200-17               |
| Recombinant human TNF $\alpha$                                         | PeptoTech                    | 300-01A              |
| Recombinant human IL1beta/IL1F2                                        | R & D                        | 201-LB-025           |
| Recombinant human IL-23                                                | R & D                        | 1290-IL-010          |
| Recombinant human IL-18/IL-1F4                                         | R & D                        | 9124-IL-010          |
| IL-23R blocking peptide                                                | BD BioScience                | MBS9222188           |
| Staurosporine                                                          | KOM                          | AG-CN-0022-C100      |
| 5-(N,N-dimethyl)-Amiride(DMA)                                          | CAY                          | 19100                |
| Mito-TEMPO                                                             | ENZO                         | ALX-430-150-M005     |
| Pertussis toxin(PTx)                                                   | List Biological Laboratories | LBL-0901-80          |
| Ionomycin Ca2+ salt                                                    | Abcam                        | ab120116             |
| Complete Freund's Adjuvant (CFA)                                       | Chondrex                     | #7023                |
| IRBP peptide (1-20) human                                              | ANASPEC                      | AS-62297             |
| Triton(R)X-100                                                         | Nacalai                      | 35501-02             |
| Q-Vai-Asp-Oph                                                          | R & D                        | OPH001-01M           |
| Birinapant                                                             | CAY                          | 19699                |
| Amicon Ultra-15                                                        | Millipore                    | UFC901024, R9CA90257 |
| <b>ELISA</b>                                                           |                              |                      |
| Name                                                                   | Vender                       | Catalog number       |
| Human exosome CD63 ELISA kit                                           | CosmoBio                     | HAK-HEL6363-1        |
| Highly Sensitive ELISA kit for 8-OHdG                                  | JalCA                        | KOG-HS10/E           |
| <b>LDH Cytotoxicity assay</b>                                          |                              |                      |
| Name                                                                   | Vender                       | Catalog number       |
| CytoSelect LDH Cytotoxicity Assay kit                                  | CosmoBio                     | CBA-241              |
| <b>immune cells isolation</b>                                          |                              |                      |
| Name                                                                   | Vender                       | Catalog number       |
| Ficoll-Paque plus                                                      | Cytiva (GE)                  | 17144003             |
| Polymorphprep                                                          | CosmoBio                     | 1114683              |
| <b>DNA isolation</b>                                                   |                              |                      |
| Name                                                                   | Vender                       | Catalog number       |
| MagNA Pure Compact                                                     | Roche Life Science           |                      |
| DNA Extractor SP Kit                                                   | WAKO                         | 296-60501            |
| DNA Extractor WB kit                                                   | WAKO                         | 291-50502            |
| Quant-iT™ dsDNA Assay Kits, high sensitivity (HS) and broad range (BR) | InvitroGen                   | Q33120               |
| <b>RNA isolation</b>                                                   |                              |                      |
| Name                                                                   | Vender                       | Catalog number       |
| Rneasy Mini kit (250)                                                  | QIAGEN                       | 74106                |
| QIA shredder (250)                                                     | QIAGEN                       | 79656                |
| <b>Real-Time PCR</b>                                                   |                              |                      |
| Name                                                                   | Vender                       | Catalog number       |
| TB Green Fast qPCR Mix                                                 | TaKaRa                       | RR430A               |
| <b>Transfection Reagent</b>                                            |                              |                      |
| Name                                                                   | Vender                       | Catalog number       |
| LentiGuide-Puro                                                        | Addgene                      |                      |
| Avalanche-Omni Transfection Reagent                                    | EZ biosystems                | EZT-OMNI-1-1.5       |

| Gene Editing Reagent                   |               |                |
|----------------------------------------|---------------|----------------|
| Name                                   | Vender        | Catalog number |
| In-Fusion HD cloning kit               | TaKaRa        | Z9649N         |
| DNA Ligation Kit (Mighty Mix)          | TaKaRa        | 6023           |
| PrimeSTAR GXL DNA polymerase           | TaKaRa        | R050A          |
| CUGA7 gRNA Synthesis kit               | Nippon Gene   | 314-08691      |
| ISOSPIN PCR Product                    | Nippon Gene   | 315-08001      |
| Establishment of p0 cell Reagent       |               |                |
| Name                                   | Vender        | Catalog number |
| L-Glutamine(200mM)                     | Thermo Fisher | A2916801       |
| Sodium Pyruvate(100mM)                 | Thermo Fisher | 11360070       |
| Uridine>99%                            | Sigma         | U3750-1G       |
| Ethidium bromide solution (EtBr)       | Sigma         | E1385-5ML      |
| Isolation of Mitochondria              |               |                |
| Name                                   | Vender        | Catalog number |
| Mitochondria/Cytosol Fractionation Kit | Bio Vision    | #K256-25       |

## Antibodies

| Antibodies for western blotting                              |                           |                |             |
|--------------------------------------------------------------|---------------------------|----------------|-------------|
| Name                                                         | Vender                    | Catalog number | clone       |
| ASC(B-3)                                                     | Santa Cruz                | sc-514414      | G0716       |
| Anti-TLR9(26C593)                                            | Santa Cruz                | sc-52966       | E0818       |
| Rb mAb to ProCaspase1+p10+p12                                | Abcam                     | ab179515       | GR3232708-2 |
| Rb mAb to Gasdermin D                                        | Abcam                     | ab210070       |             |
| Anti-cleaved N-terminal GSDMD Antibody                       | Abcam                     | ab215203       |             |
| Anti-TSG101 Ms mAb                                           | Abcam                     | ab83           | 4A10        |
| Anti-Calnexin (C5C9) Rabbit mAb                              | Cell Signaling            | 2679S          |             |
| Anti-Lamp1 Rabbit mAb                                        | Abcam                     | ab24170        |             |
| Anti- $\beta$ actin Rabbit mAb (HRP Conjugate)               | Cell Signaling            | #5125S         |             |
| Anti-p38 MAPK Rabbit Ab                                      | Cell Signaling            | #9212S         |             |
| Anti-pp38 MAPK Rabbit Ab                                     | Cell Signaling            | #9211S         |             |
| Anti-p42/44 MAPK(Erk1/2) Rabbit Ab                           | Cell Signaling            | 137F5          |             |
| Anti-pp42/44 MAPK(Erk1/2) Rabbit Ab                          | Cell Signaling            | T202/Y204      |             |
| VADC Rabbit Ab                                               | Cell Signaling            | #4866S         |             |
| Purified Mouse Anti-Tom20                                    | BD BioScience             | 612278         |             |
| Purified Mouse Anti-Tim23                                    | BD BioScience             | 611222         |             |
| Purified Mouse Anti-Flotillin-1                              | BD BioScience             | 610821         |             |
| mAb anti-FLAG M2-Peroxidase(HRP) antibody                    | Sigma                     | A8592-1MG      | 046K6075    |
| Monoclonal Anti-acetylated Tublin antibody produced in mouse | Sigma                     | 109M4831V      |             |
| pAb anti-NLRP3/NALP3                                         | NOVUS                     | NBP2-12446     | B-3         |
| Anti-hIL-1b Affinity Purified Goat IgG                       | RSD                       | AF-201-NA      | QM1018101   |
| Ms mAb Anti-Hu CD9                                           | Invivogen                 | AHS0902        |             |
| Anti-CD63 (LAMP3) mAb                                        | MBL                       | MEX002-3       |             |
| Cleaved Caspase-8 Rabbit mAb                                 | Cell Signaling Technology | #9496          |             |
| TFAM antibody                                                | Cell Signaling Technology | #7495          |             |
| Anti-Sodium Potassium ATPase antibody                        | Abcam                     | ab76020        |             |
| Apolipoprotein A1 antibody                                   | GeneTex                   | GTX112692      |             |
| Antibodies for flow cytometry and confocal microscopy        |                           |                |             |
| Name                                                         | Vender                    | Catalog number | clone       |
| Mito Tracker Green                                           | InvitroGen                | M7514          |             |
| Mito Tracker DeepRed                                         | InvitroGen                | M22426         |             |
| MitoSox Red Mitochondrial Superoxide Indicator               | InvitroGen                | M36008         | 2127454     |
| Quanti-iT PicoGreen dsDNA reagent                            | InvitroGen                | 1094619        |             |
| Anti-CD11b PE (clone M1/70)                                  | BD BioScience             | 553311         | 64266       |
| Anti-Ly6G APC-Cy7 (clone 1A8)                                | Bio Legend                | 128031         | B250488     |
| Anti-Ly6C Brilliant Violet (clone HK1.4)                     | Sirigen                   | 127623         | B238261     |

| Antibodies for Immune electron microscopy         |                 |                |         |
|---------------------------------------------------|-----------------|----------------|---------|
| Name                                              | Vender          | Catalog number | clone   |
| Anti-8-hydroxy-deoxyguanosine monoclonal antibody | JaLCA           | MOG-020P       |         |
| Anti-dsDNA antibody                               | Abcam           | ab27156        |         |
| Anti-mouse IgG(H+L) 10nm Gold                     | BBI Solutions   | EM.GMHL10      |         |
| Nanogold®-Fab' Goat anti-Mouse IgG(H+L)           | Nanoprobes      | #2002          |         |
| Beads for AutoMACS                                |                 |                |         |
| Name                                              | Vender          | Catalog number | clone   |
| Human CD14 microbeads                             | Miltenyi Biotec | 130-050-201    |         |
| Beads for Cell culture                            |                 |                |         |
| Name                                              | Vender          | Catalog number | clone   |
| Purified Anti-human CD28 (clone CD28.2)           | BD BioScience   | 14-0289-82     | E025695 |
| Purified Anti-human CD3 (clone OKT3)              | BD BioScience   | 16-0037-85     | E019164 |

### Reporter cells for measurement of cytokine bioactivity and TLR signaling

| Name                  | Vender    | Catalog number |
|-----------------------|-----------|----------------|
| HEK-Blue IL-1 $\beta$ | InvivoGen | hkb-il1b       |
| HEK-Blue IL-12        | InvivoGen | hkb-il12       |
| HEK-Blue IL-17        | InvivoGen | hkb-il17       |
| HEK-Blue IL-18        | InvivoGen | hkb-il18       |
| HEK-Blue IL-23        | InvivoGen | hkb-il23       |
| HEK-Blue TNF $\alpha$ | InvivoGen | hkb-tnfadmyd   |
| HEK-Blue TLR2         | InvivoGen | hkb-htlr2      |
| HEK-Blue TLR3         | InvivoGen | hkb-htlr3      |
| HEK-Blue TLR4         | InvivoGen | hkb-htlr4      |
| HEK-Blue TLR7         | InvivoGen | hkb-htlr7      |
| HEK-Blue TLR8         | InvivoGen | hkb-htlr8      |
| HEK-Blue TLR9         | InvivoGen | hkb-htlr9      |

### Primers

| mtDNA primer for Real-Time PCR                             |                         |                                                                                |
|------------------------------------------------------------|-------------------------|--------------------------------------------------------------------------------|
| Human cytochrome C oxidase subunitIII<br>( <i>CoxIII</i> ) | Fw                      | 5'-ATGACCCACCAATCACATGC-3'                                                     |
|                                                            | Rv                      | 5'-ATCACATGGCTAGGCCGGAG-3'                                                     |
| Human NADH dehydrogenase ( <i>NADH</i> )                   | Fw                      | 5'-ATACCCATGGCCAACCTCCT-3'                                                     |
|                                                            | Rv                      | 5'-GGGCCTTTCGTAGTTGTAT-3'                                                      |
| Primers and vector for gene cloning                        |                         |                                                                                |
| Human TLR9 cloning primer (infusion)                       | Fw                      | 5'-GTGACAGATCCAAGGTGAAGT-3'                                                    |
|                                                            | Rv                      | 5'-CTTCTCTACAAATGCATCACT-3'                                                    |
| 3*FLAG Oligo promoter                                      | Fw                      | 5'-GACTACAAAGACCATGACGGTGATTATAAAGATCATGACATCGACTACAAGGATGACGATGACAAGTAGTGA-3' |
|                                                            | Rv                      | 5'-TCACTACTTGTCTATCGTATCCTTGTAGTCGATGTCATGATCTTTATAATCACCGTCATGGTCTTTGTAGTC-3' |
| Human caspase1+3*FLAG cloning primer<br>(infusion)         | Fw (lenti-Casp)         | 5'-AATTCTGCAGCGGCCGCGCCACCATGGCCGACAAG-3'                                      |
|                                                            | Rv(Casp-FLAG)           | 5'-CCGTCATGGTCTTTGTAGTCATGTCCTGGGAAGAGGTAGA-3'                                 |
|                                                            | Rv (FLAG-Lenti)         | 5'-GGAGAGGGGCGGATCCCTACCAAGAAGGCTCAAAG-3'                                      |
| Human NLRP3+3*FLAG cloning primer<br>(infusion)            | Fw (Lenti-NLRP3)        | 5'-AATTCTGCAGCGGCCGCGCCACCATGAAGATGGCAAGCACCCG-3'                              |
|                                                            | Rv (NLRP3-FLAG)         | 5'-CCGTCATGGTCTTTGTAGTCCTCAAGAAGGCTCAAAGACGA-3'                                |
|                                                            | Rv (FLAG-Lenti)         | 5'-GGAGAGGGGCGGATCCCTACCAAGAAGGCTCAAAG-3'                                      |
| Human mutant NLRP3(Val200Met)<br>cloning primer            | Fw (Lenti-NLRP3)        | 5'-AATTCTGCAGCGGCCGCGCCACCATGAAGATGGCAAGCACCCG-3'                              |
|                                                            | Rv1 (mutation sequence) | 5'-AATGGGACTCATGGGGCTCT-3'                                                     |
|                                                            | Fw2 (mutation sequence) | 5'-AGAGCCCCATGAGTCCATT-3'                                                      |
|                                                            | Rv (FLAG-Lenti)         | 5'-GGAGAGGGGCGGATCCCTACCAAGAAGGCTCAAAG-3'                                      |
| Caspase1 p10+3*FLAG cloning primer<br>(infusion)           | Fw                      | 5'-AATTCTGCAGCGGCCGCGCCACCATGGCTATTAAGA-3'                                     |
|                                                            | Rv                      | 5'-CCGTCATGGTCTTTGTAGTCATGTCCTGGGAAGAGGTAGA-3'                                 |
| Caspase1 p20+3*FLAG cloning primer<br>(infusion)           | Fw                      | 5'-AATTCTGCAGCGGCCGCGCCACCATGAACCCAGCT-3'                                      |
|                                                            | Rv                      | 5'-CCGTCATGGTCTTTGTAGTCATCTTTAAACACACCCACAC-3'                                 |
| Gasmd-NT-3*FLAG                                            | Eurofins Genomics       |                                                                                |
| TSG101-mCherry                                             | VectorBuilder           | pLV[Exp]-Puro-EF1A>mCherry/hTSG101[NM_006292.4]                                |

| Target sequence for Generation of ko-cell-lines |                |                                                                                             |
|-------------------------------------------------|----------------|---------------------------------------------------------------------------------------------|
| Generation of KO-NLRP3 THP1 cell                | sgRNA sequence | 5'- CGAAGCAGCACTCATGCGAG-3'<br>5'- GTCTGATTCCGAAGTCACCG-3'<br>5'- ATTCTCCCCACATAGAGTC-3'.   |
| Generation of KO-Caspase1 THP1 cell             | sgRNA sequence | 5'- GACAGTATTCCTAGAAGAAC-3'<br>5'- TAATGAGAGCAAGACGTGTG-3',<br>5'- GCTCCCTAGAAGAAGCTCAA-3'. |
| Generation of KO-GasderminD THP1 cell           | sgRNA sequence | 5'- CGGCTCTCACCTGTGCGGG-3'<br>5'- CTTGCTTTAGACGTGCAGCG-3'<br>5'- ACCTCCAGCCACCCGCGAC-3'.    |

**Appendix Table S2: Details of the reagents, antibodies, cell lines, and primers.**
